# Supplementary material for: The Significance of Neural Inter-Frequency Correlations
Source: Research Square preprint supplement (doi:10.21203/rs.3.rs-329644/v1), 2021-03-22
Supplement: Supplementary file 1 [file 0bd2a6ca2a22431c08e2a446.pdf]

# Contents

|          |                                                                                            |           |
|----------|--------------------------------------------------------------------------------------------|-----------|
| <b>1</b> | <b>Main</b>                                                                                | <b>1</b>  |
| 1.1      | Previous Work on Neural Inter-Frequency Relationships . . . . .                            | 1         |
| 1.1.1    | Class 1: Indirect decoding methods . . . . .                                               | 1         |
| 1.1.2    | Class 2: Direct comparison of neural features . . . . .                                    | 2         |
| 1.2      | The Contribution of this Work . . . . .                                                    | 2         |
| 1.3      | The Continuous Wavelet Transform . . . . .                                                 | 3         |
| 1.3.1    | Choice of Time-Frequency Decomposition . . . . .                                           | 3         |
| 1.3.2    | Wavelet Decomposition . . . . .                                                            | 3         |
| 1.3.3    | Choice of the Continuous Wavelet Transform . . . . .                                       | 3         |
| 1.4      | Measuring Inter-Scale Correlations . . . . .                                               | 4         |
| 1.5      | Multiple Testing of Correlation Matrices . . . . .                                         | 4         |
| 1.6      | Our Custom Monte Carlo Test Statistic . . . . .                                            | 4         |
| <b>2</b> | <b>Results</b>                                                                             | <b>5</b>  |
| 2.1      | Neural processes reliably have signatures in frequencies as low as the beta band . . . . . | 5         |
| 2.2      | Few low-high frequency correlations . . . . .                                              | 7         |
| 2.3      | The vast majority of significant inter-scale correlations were positive . . . . .          | 8         |
| 2.4      | Time-domain artifacts create strong low-mid frequency correlations . . . . .               | 8         |
| 2.5      | The neural signatures are chronically robust . . . . .                                     | 9         |
| <b>3</b> | <b>Discussion</b>                                                                          | <b>9</b>  |
| 3.1      | Significance of this Work . . . . .                                                        | 9         |
| 3.2      | Possible Improvements to the Statistical Test . . . . .                                    | 10        |
| 3.3      | Do only correlated frequency bands contain interesting information? . . . . .              | 10        |
| 3.4      | Future work . . . . .                                                                      | 10        |
| <b>4</b> | <b>Methods</b>                                                                             | <b>10</b> |
| 4.1      | Dataset . . . . .                                                                          | 10        |
| 4.1.1    | Dataset General Characteristics . . . . .                                                  | 10        |
| 4.1.2    | Dataset Frequency Characteristics . . . . .                                                | 11        |
| 4.2      | Data Pre-processing . . . . .                                                              | 11        |
| 4.2.1    | Spectral Interpolation and Phase Randomisation for Line Noise Removal . . . . .            | 11        |
| 4.2.2    | Current Source Density Referencing of Electrodes . . . . .                                 | 11        |
| 4.2.3    | Standardizing the Length of the Recordings . . . . .                                       | 11        |
| 4.2.4    | Pre-whitening of Data . . . . .                                                            | 11        |
| 4.3      | Data Post-Processing . . . . .                                                             | 12        |
| 4.3.1    | Continuous Wavelet Decomposition and the Morse Wavelet . . . . .                           | 12        |
| 4.3.2    | COI . . . . .                                                                              | 12        |
| 4.3.3    | Pearson Correlation Coefficient . . . . .                                                  | 12        |
| 4.3.4    | Data post-processing summary . . . . .                                                     | 13        |
| 4.4      | CWT Inter-Scale Correlation Significance Test Implementation . . . . .                     | 13        |
| 4.4.1    | Estimating the Mean White Noise Inter-Scale Correlation Matrix . . . . .                   | 13        |
| 4.4.2    | Generating the Normal Distribution due to Intra-Scale Autocorrelation . . . . .            | 14        |
| 4.4.3    | Summing the Elements to Produce the Null Distribution . . . . .                            | 15        |
| 4.4.4    | Multiple Testing of Test Statistics under Dependency . . . . .                             | 15        |
| <b>5</b> | <b>Acknowledgements</b>                                                                    | <b>15</b> |
| <b>6</b> | <b>Supplemental Material</b>                                                               | <b>16</b> |
| 6.1      | Code and Full Results . . . . .                                                            | 16        |
| 6.2      | Phase Randomisation Implementation . . . . .                                               | 16        |
| 6.3      | Testing the Normality of the Phase-Randomisation Null Distributions . . . . .              | 16        |
| 6.4      | Conservatively Removing the Effects of the Non-Dyadic Sampling . . . . .                   | 16        |
| 6.5      | Spectral Interpolation Implementation . . . . .                                            | 17        |
| 6.6      | Current Source Density Referencing Implementation . . . . .                                | 20        |

|     |                                                                                 |    |
|-----|---------------------------------------------------------------------------------|----|
| 6.7 | Pre-whitening Implementation . . . . .                                          | 20 |
| 6.8 | Pseudo-Random Number Generation for Monte Carlo White Noise Processes . . . . . | 21 |
